# Supplementary material
Source: publisher figshare collection journal article supplement (https://diabetesjournals.figshare.com/ndownloader/files/22800821)
Supplement: Supplementary file 1 [file 22800821]

**SUPPLEMENTAL MATERIAL**

**Figure 1:** Participant flow chart

**Figure 2:** Scatter plots with error bars depicting mean and 95% confidence intervals for cold detection threshold (CDT), warm detection threshold (WDT) and mechanical pain sensitivity (MPS) for each study group.

**Figure 3:** Histograms depicting number (n, absent and present) of subjects with wind-up ratio (WUR) and dynamic mechanical sensitivity (DMS) or allodynia for each patient group (*p<0.05).

**Figure 4:** Scatter plots with error bars depicting mean and 95% confidence intervals for cold pain threshold (CPT), Heat pain threshold (HPT) for each study group.

**Figure 5:** Scatter plot demonstrating Pearson’s correlation coefficient between NTSS-6 and functional connectivity between the primary somatosensory cortex to frontal orbital cortex.


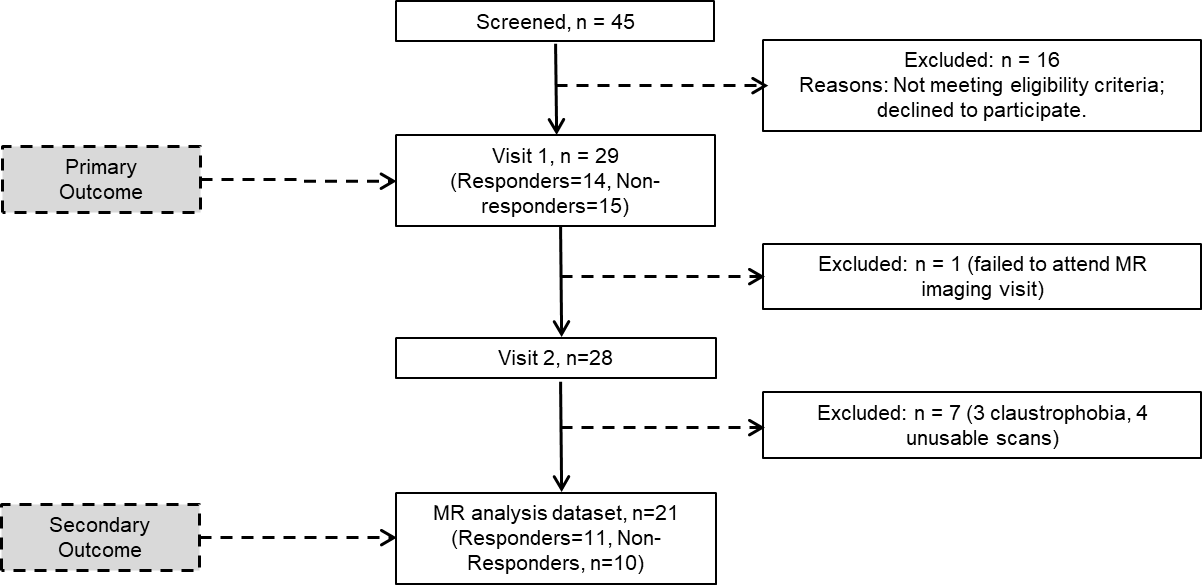


**Figure 1:** Participant flow chart


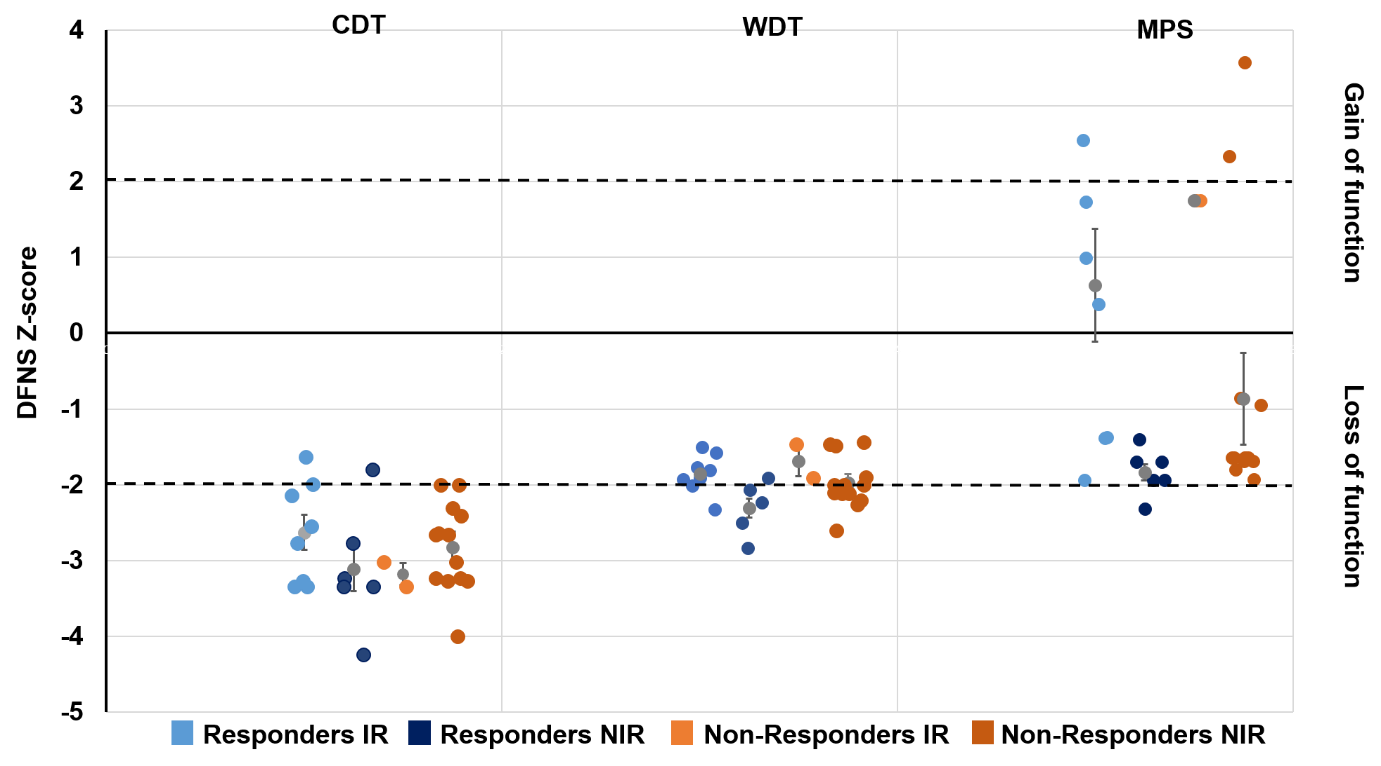


**Figure 2:** Scatter plots with error bars depicting mean and 95% confidence intervals for cold detection threshold (CDT), warm detection threshold (WDT) and mechanical pain sensitivity (MPS) for each study group.

* *

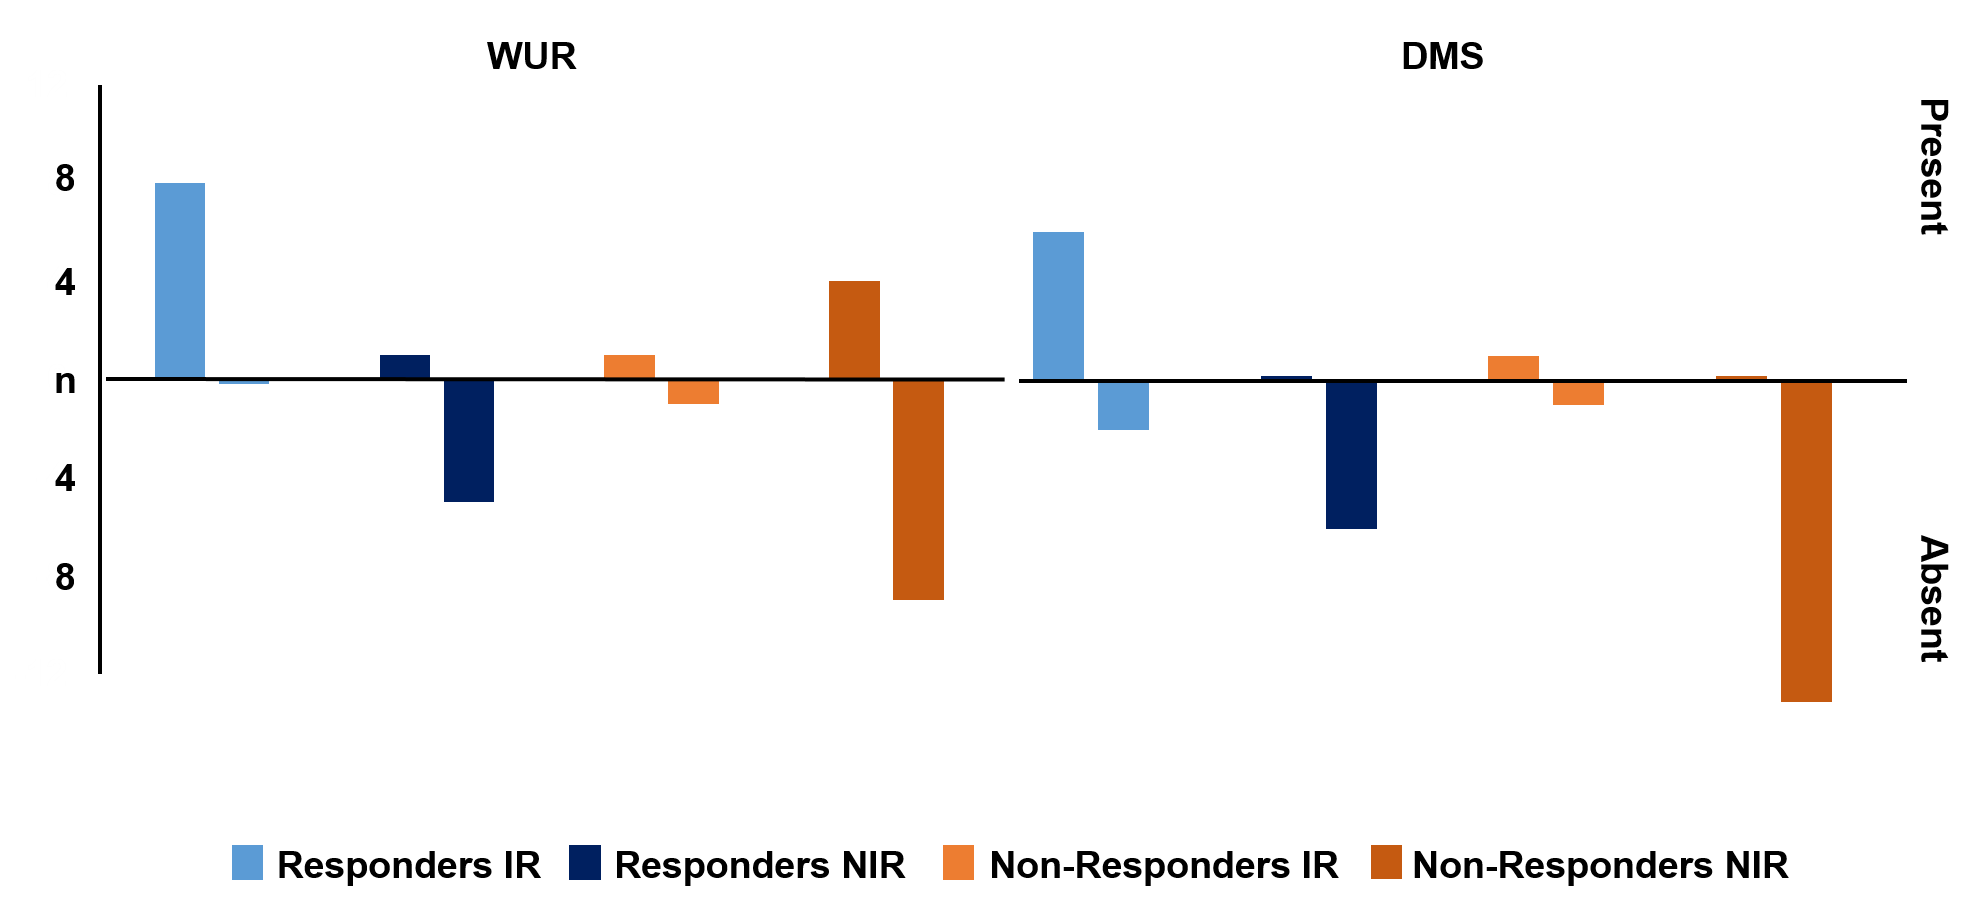


**Figure 3:** Histograms depicting number (n, absent and present) of subjects with wind-up ratio (WUR) and dynamic mechanical sensitivity (DMS) or allodynia for each patient group (*p<0.05).


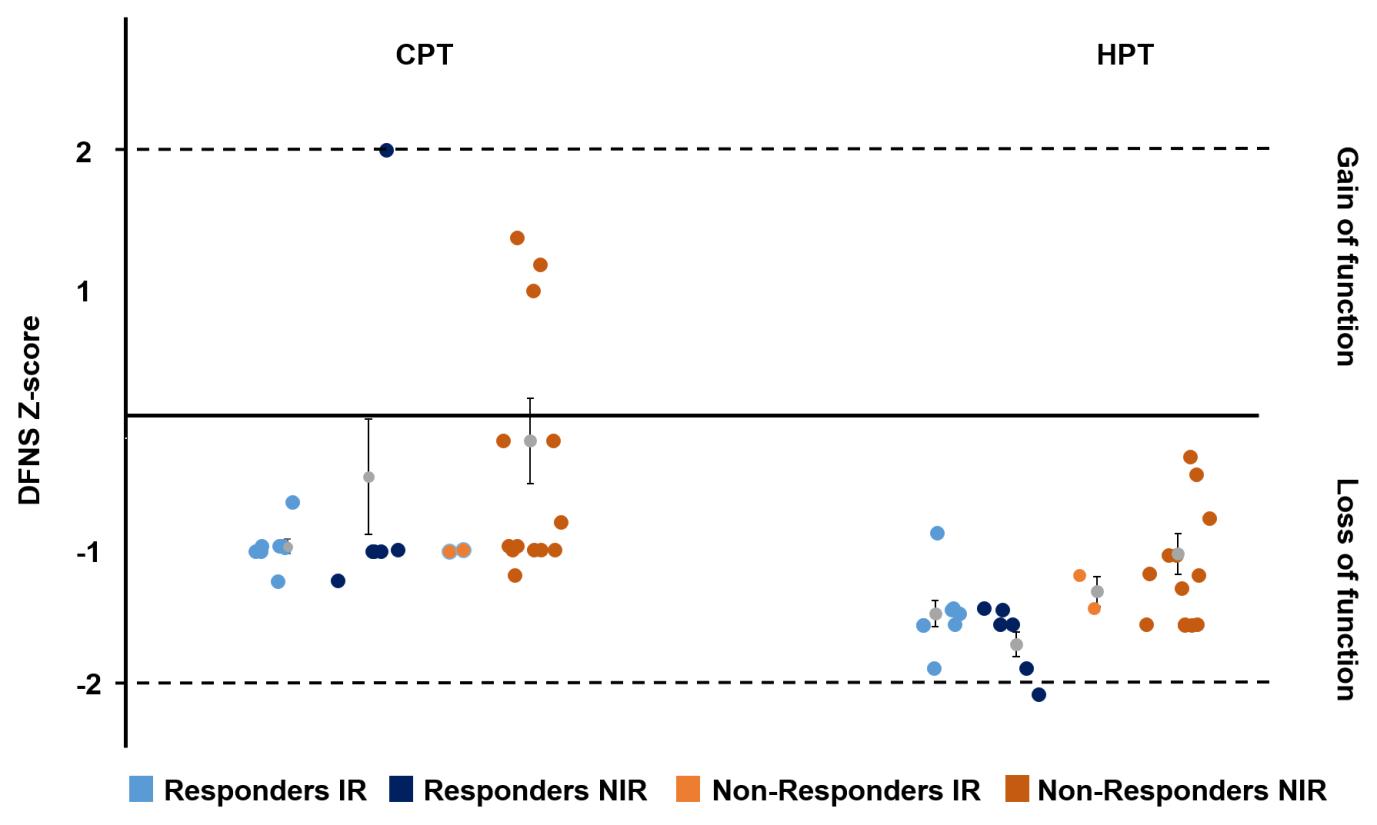


**Figure 4:** Scatter plots with error bars depicting mean and 95% confidence intervals for cold pain threshold (CPT), Heat pain threshold (HPT) for each study group.


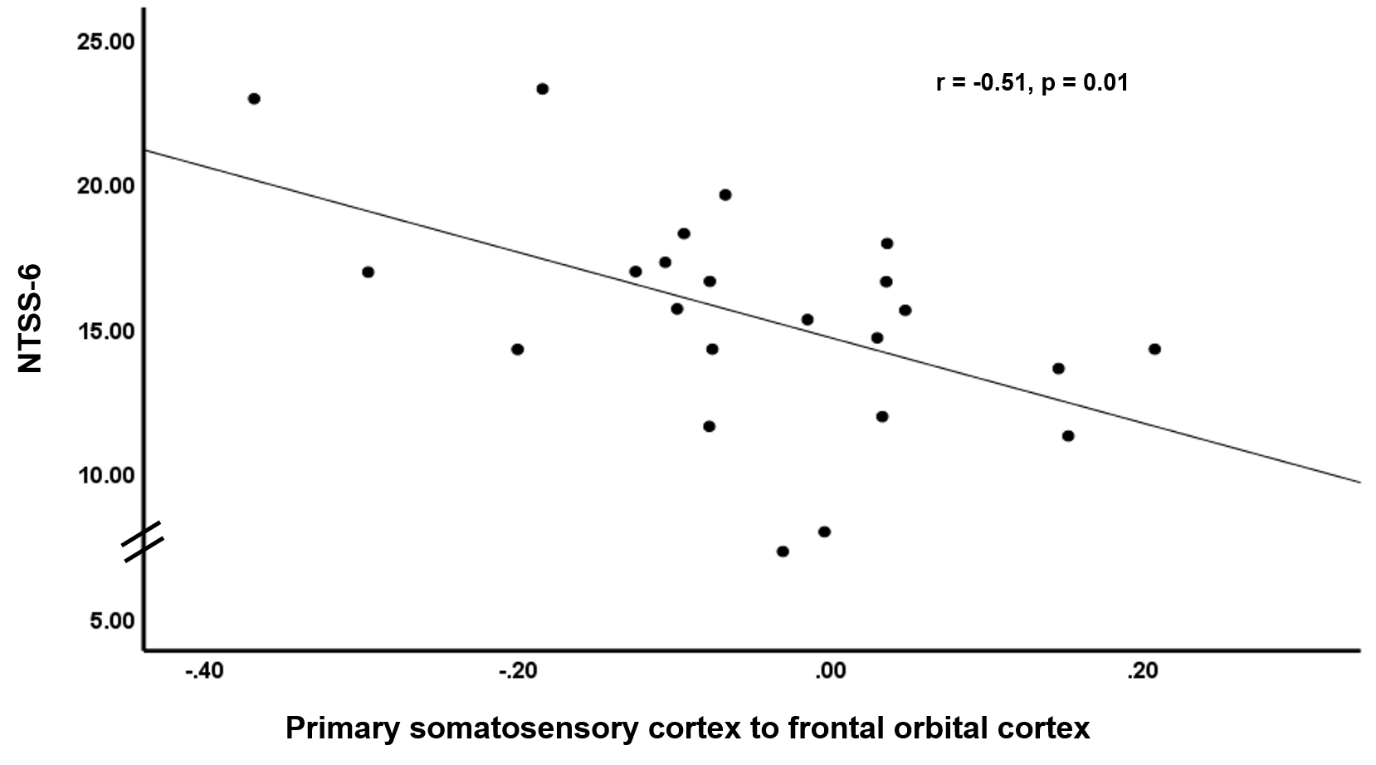


**Figure 5:** Scatter plot demonstrating Pearson’s correlation coefficient between NTSS-6 and functional connectivity between the primary somatosensory cortex to frontal orbital cortex.
